# Supplementary material for: SLC25A1 promotes tumor growth and survival by reprogramming energy metabolism in colorectal cancer
Source: PubMed Central journal article supplement (PMC8627508; doi:10.1038/s41419-021-04411-2), 2021-11-27
Supplement: 41419_2021_4411_MOESM2_ESM.pdf [file 41419_2021_4411_MOESM2_ESM.pdf]

**Re: Request agreement for addition of Xianli He as a co-corresponding author** 回 升 时 音

发件人: Ying YANG <yingyang\_dr@126.com>

收件人: wangnanafmu <wangnanafmu@163.com> +

时 间: 2021年11月06日 12:39 (星期六)

翻译成中文

你可以用泛微OA来审批... 点击启用

Prof. Nan Wang,

I agree to add Xianli He as a co-corresponding author.

Ying Yang  
[yingyang\\_dr@126.com](mailto:yingyang_dr@126.com)

Ying Yang agree to add Xianli He as a co-corresponding author

**Re: Request agreement for addition of Xianli He as a co-corresponding author** 回 升 时 音

发件人: 贺加星 <hejiaxing318@qq.com> +

收件人: 王楠通讯 <wangnanafmu@163.com> +

时 间: 2021年11月06日 13:19 (星期六)

翻译成中文

注册免费送云服务器 立即注册

I agree to add Xianli He as a co-corresponding author.

Jiaxing He agree to add Xianli He as a co-corresponding author

**Re: Request agreement for addition of Xianli He as a co-corresponding author** 回 升 时 音

发件人: doctorzb0207 <doctorzb0207@163.com>

收件人: 王楠通讯 <wangnanafmu@163.com> +

时 间: 2021年11月06日 12:39 (星期六)

翻译成中文

你可以用泛微OA来审批... 点击启用

I agree to add Xianli He as a co-corresponding author.

Bo Zhang agree to add Xianli He as a co-corresponding author

**Re: Request agreement for addition of Xianli He as a co-corresponding author** 回 升 时 音

发件人: 张战胜 <zws123@163.com>

收件人: 王楠通讯 <wangnanafmu@163.com> +

时 间: 2021年11月06日 13:54 (星期六)

翻译成中文

【企业出行】选费康出行, 省钱省力还省时! 立即咨询

I agree to add Xianli He as a co-corresponding author.

Zhansheng Zhang agree to add Xianli He as a co-corresponding author

**Re: Request agreement for addition of Xianli He as a co-corresponding author**    

发件人: 突然的自我<467421902@qq.com>

收件人: 王楠通讯<wangnanafmu@163.com> 

时 间: 2021年11月06日 14:38 (星期六)

---

企业出行新客首充, 充一返一, 最高返100% [免费咨询](#)

I agree to add Xianli He as a co-corresponding author.

Guozhan Jia agree to add Xianli He as a co-corresponding author

**Re: Request agreement for addition of Xianli He as a co-corresponding author**    

发件人: 刘士祺<2843856726@qq.com>

收件人: 王楠通讯<wangnanafmu@163.com> 

时 间: 2021年11月06日 12:48 (星期六)

---

 [翻译成中文](#)

---

充10000返10000! 曹焜企业出行优惠福利多! [免费咨询](#)

I agree to add Xianli He as a co-corresponding author.

Shiqi Liu agree to add Xianli He as a co-corresponding author

**回复: Request agreement for addition of Xianli He as a co-corresponding author**    

发件人: 鸡翅<504435076@qq.com>

收件人: 王楠通讯<wangnanafmu@163.com> 

时 间: 2021年11月06日 13:03 (星期六)

---

给老板省钱! 曹焜企业出行, 虚假报销0发生 [免费咨询](#)

Prof. Nan Wang

I agree to add Xianli He as a co-corresponding author.

Tao Wu agree to add Xianli He as a co-corresponding author

**Re: Request agreement for addition of Xianli He as a co-corresponding author**    

发件人: wanghe<wanghe@fmmu.edu.cn>

收件人: 王楠通讯<wangnanafmu@163.com> 

抄送人: yinyang\_dr<yinyang\_dr@126.com> 176228342<176228342@qq.com> doctorzb0207<doctorzb0207@163.co

[存所有抄送人](#)

时 间: 2021年11月08日 09:26 (星期一)

---

 [翻译成中文](#)

---

 你可以用泛微OA来审批... [点击启用](#)

I agree to add Xianli He as a co-corresponding author.

Xianli He agree to add himself as a co-corresponding author
