# Supplementary material for: SLC25A1 promotes tumor growth and survival by reprogramming energy metabolism in colorectal cancer
Source: PubMed Central journal article supplement (PMC8627508; doi:10.1038/s41419-021-04411-2), 2021-11-27
Supplement: 41419_2021_4411_MOESM3_ESM.pdf [file 41419_2021_4411_MOESM3_ESM.pdf]

# DECLARATION OF CONTRIBUTIONS TO ARTICLE

# ADMC

Manuscript Number:

CDDIS-21-3271RR

Journal Name:

*Cell Death & Disease*

(the 'Journal')

Proposed Title of the Contribution:

SLC25A1 promotes tumor growth and survival by reprogramming energy metabolism in colorectal cancer

(the 'Contribution')

Author(s):

Ying Yang, Jiaxing He, Bo Zhang, Zhansheng Zhang, Guozhan Jia, Shiqi Liu, Tao Wu, Xianli He, Nan Wang

(the 'Authors')

For all *CDDis* articles, each person named as an author in the published version must be able to show he or she has contributed substantially to the article.

Authorship credit should be based on 1) substantial contributions to conception and design, acquisition of data, or analysis and interpretation of data; 2) drafting the article or revising it critically for important intellectual content; and 3) final approval of the version to be published. Authors should meet conditions 1, 2 and 3.

Any person who cannot be shown to have made a substantial contribution to the article cannot be listed as an author in the final version. The name of any person who is deemed to have made a minor contribution can, however, appear in the Acknowledgments section of the article.

Please complete the table below to indicate the contributions of all named authors to the manuscript.

| Author Full Name: | Specification of Contribution to the Manuscript:                                                      |
|-------------------|-------------------------------------------------------------------------------------------------------|
| Ying Yang         | Wrote the paper, performed most of the experiments and analyzed the data                              |
| Jiaxing He        | Performed most of the experiments and analyzed the data                                               |
| Bo Zhang          | Performed most of the in vitro experiments and analyzed the data                                      |
| Zhansheng Zhang   | Performed most of the in vitro experiments and analyzed the data                                      |
| Guozhan Jia       | Performed most of the in vivo experiments and analyzed the data                                       |
| Shiqi Liu         | Performed most of the in vivo experiments and analyzed the data                                       |
| Tao Wu            | Designed the overall study and supervised the experiments                                             |
| Xianli He         | Designed the overall study and supervised the experiments                                             |
| Nan Wang          | Designed the overall study and supervised the experiments. revised the paper and acquired the funding |
|                   |                                                                                                       |
|                   |                                                                                                       |
|                   |                                                                                                       |
|                   |                                                                                                       |

Please complete the table below to indicate the contributions of all named authors to the figures.

Figure 1:

G. J and S. L generated the data, J. H performed the statistical analysis, Y. Y assembled the figure

Figure 2:

G. J and S. L generated the data, J. H performed the statistical analysis, Y. Y assembled the figure

Figure 3:

Y. Y, J. H, B. Z. and Z. Z generated the data, J. H performed the statistical analysis, Y. Y assembled the figure

Figure 4:

B. Z. and Z. Z generated the data, J. H performed the statistical analysis, Y. Y assembled the figure

Figure 5:

Y. Y, J. H, B. Z. and Z. Z generated the data, J. H performed the statistical analysis, Y. Y assembled the figure

Figure 6:

Y. Y, J. H, B. Z. and Z. Z generated the data, J. H performed the statistical analysis, Y. Y assembled the figure

Y. Z generated the graphic abstract

Signed for and on behalf of the Author(s):

Print Name:

Date:

*Nan Wang*

Nan Wang

Nov 4th, 2021
